# Supplementary material
Source: PubMed Central journal article supplement (PMC4359920)
Supplement: supp_128.6.1123_JCS162164.pdf [file supp_128.6.1123_JCS162164.pdf]

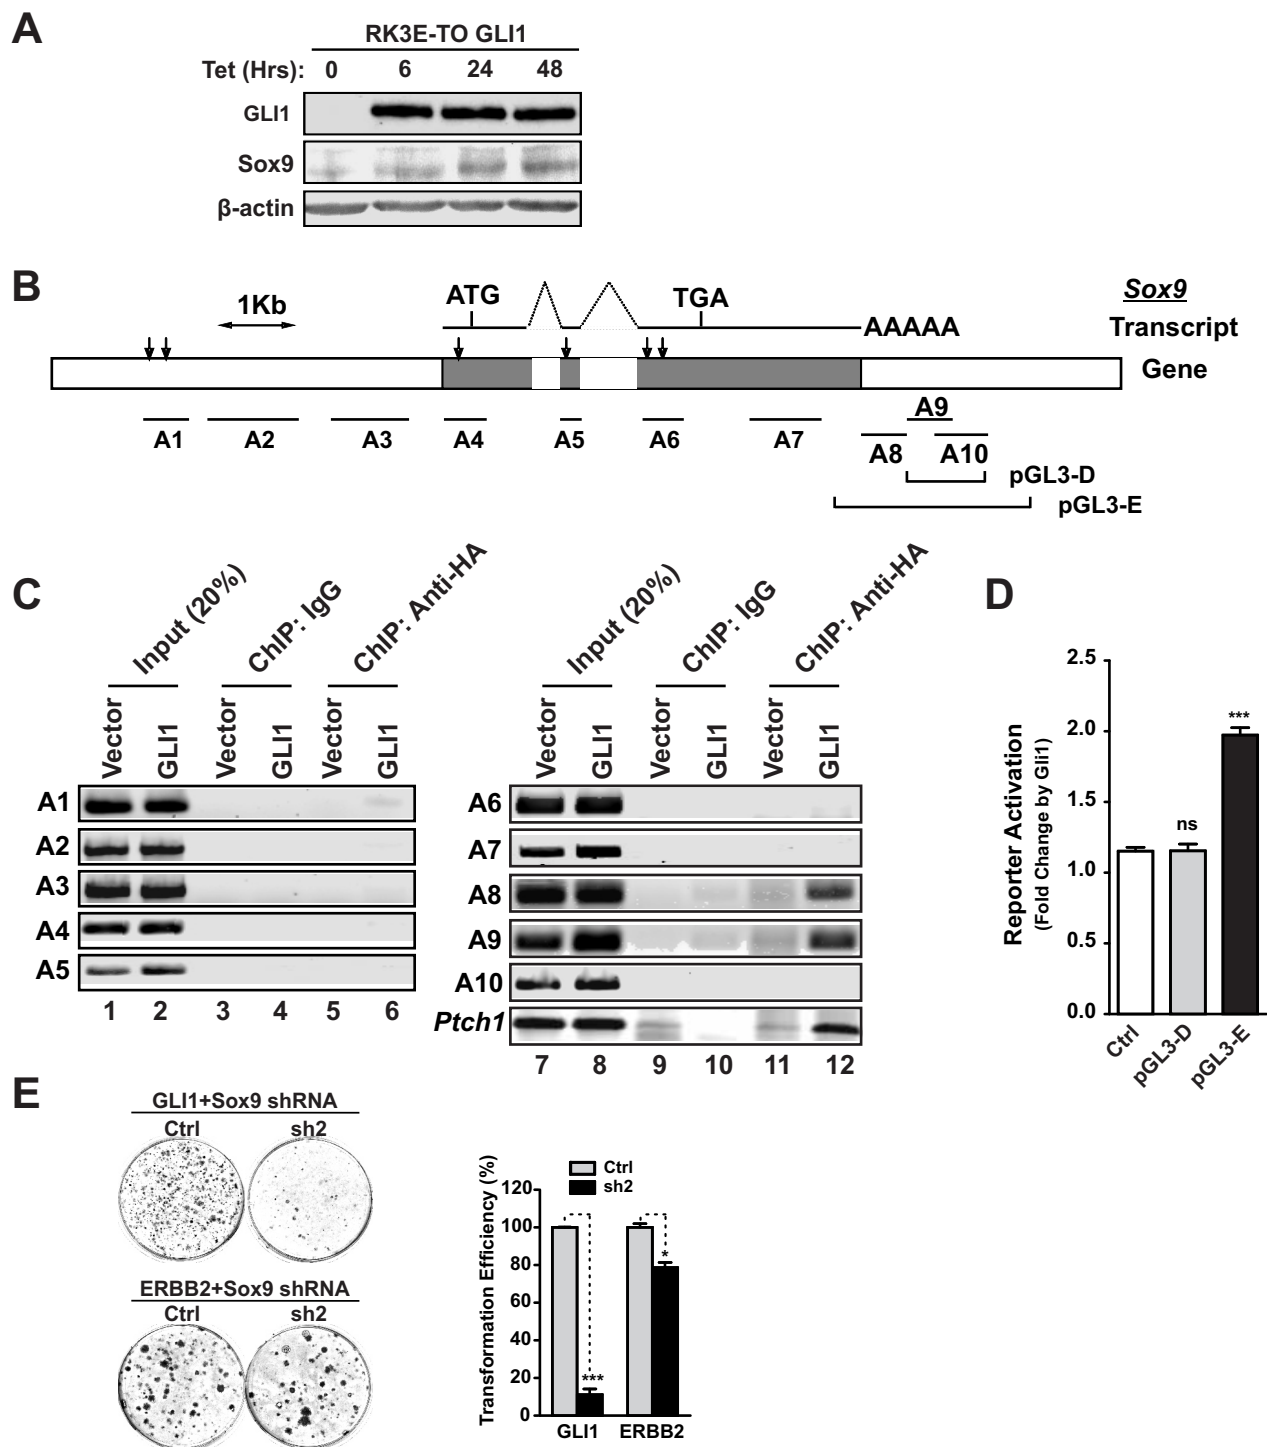

**Figure S1. Sox9 is activated by GLI1 in the rat RK3E epithelial model and is required for GLI1-mediated malignant transformation.** (A) RK3E-derived, tet-on (TO) GLI1 cells were induced with tet and cell extracts were analyzed by immunoblot. (B) Schematic of the RnSox9 locus. Potential GLI-binding sites (arrows) each contain one mismatch to the consensus GACCACCCA. ChIP-analyzed fragments (A1-A10) and fragments inserted into a luciferase reporter (pGL3-D, pGL3-E) are indicated below. Primer sequences are listed in Table S3 in the supplemental material. (C) ChIP analysis of Sox9 gene in RK3E cells. Chromatin was prepared from RK3E cells stably-transduced with HA-GLI1 retrovirus (GLI1) or empty vector (Vector). Ptch1 served as a positive control. (D) Regulation of luciferase reporter activity by GLI1 relative to empty vector in HEK293 cells. (E) In vitro transformation by GLI1 or ERBB2 was assessed in RK3E cells. \*\*\*,  $P < 0.001$ ; ns, not significant.



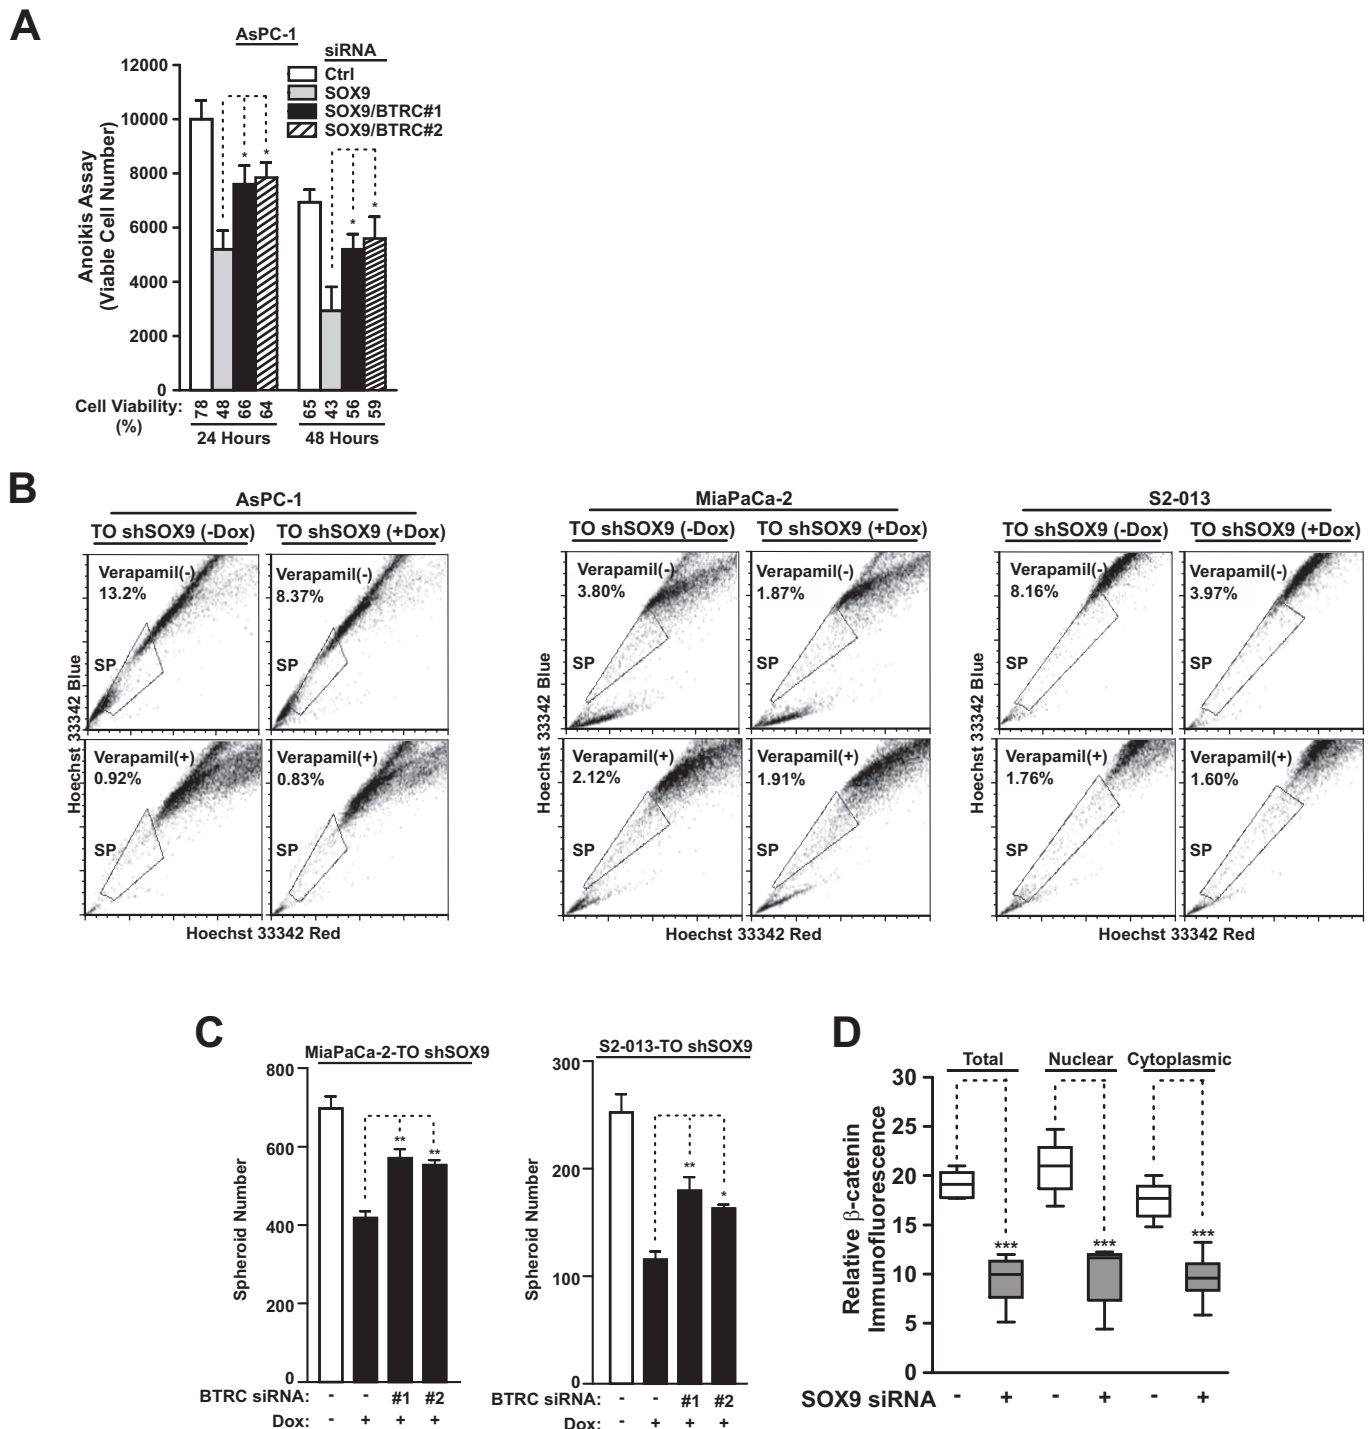

**Figure S3. SOX9 is critical for cancer cell malignant properties, cancer stem cell properties and expression of  $\beta$ -catenin in PDA cells. (A)** Anoikis assays were performed in AsPC-1 using two  $\beta$ -TrCP siRNAs. **(B)** PDA cells were treated with dox or vehicle for 5 days and then analyzed for Side population (SP) cells. **(C)** Roles of SOX9 and  $\beta$ -TrCP in tumor spheroid growth. **(D)** Regulation of  $\beta$ -catenin by SOX9. Panc-1 cells were treated with the indicated siRNA and the expression of  $\beta$ -catenin was quantitated in the nucleus and cytoplasm. For each sample, confocal images were captured for ten randomly selected fields and immunofluorescence was quantitated using Image J. Boxes show the 25th-75th percentiles and the median is indicated. The whiskers show the range.

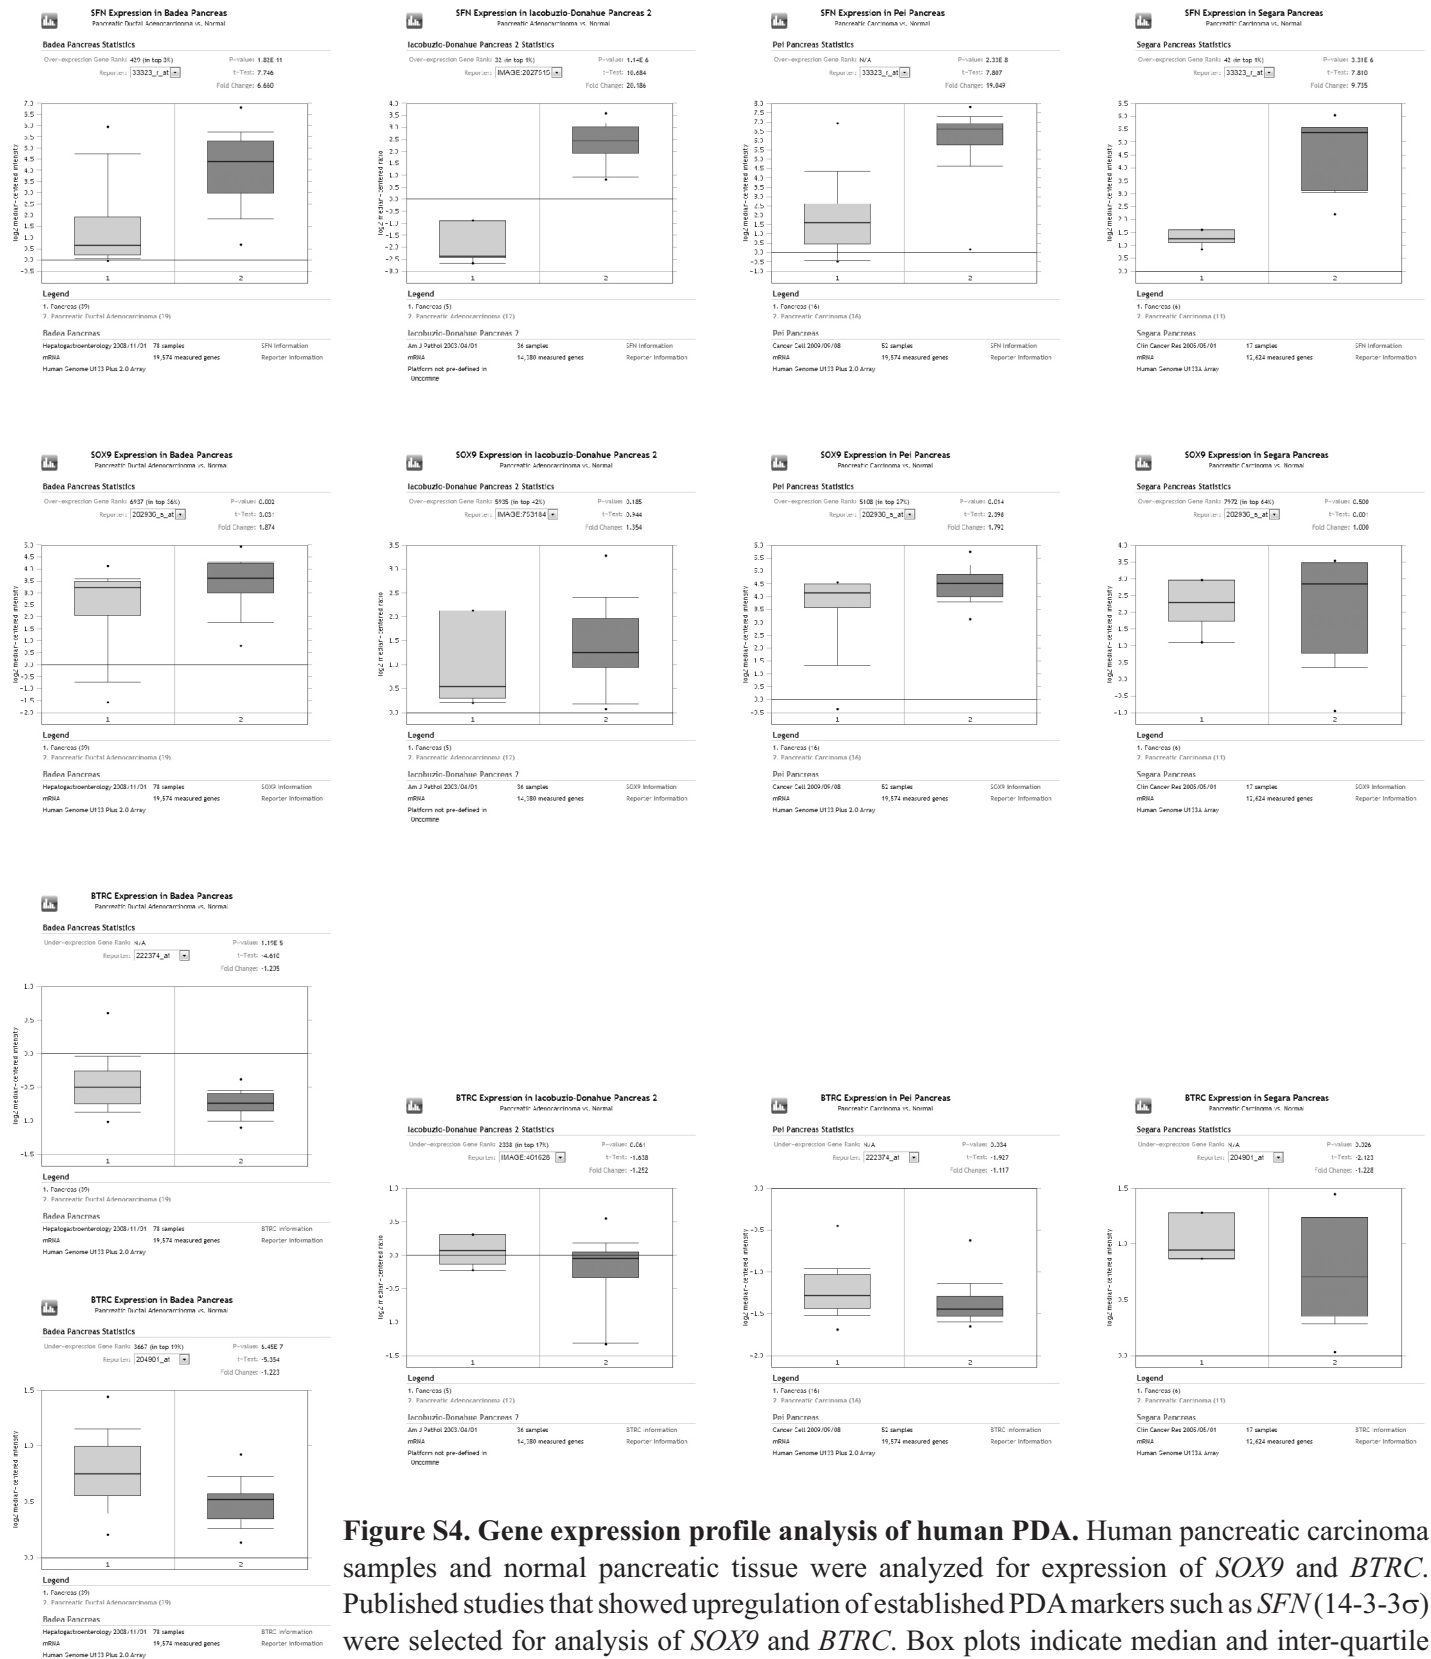

**Figure S4. Gene expression profile analysis of human PDA.** Human pancreatic carcinoma samples and normal pancreatic tissue were analyzed for expression of *SOX9* and *BTRC*. Published studies that showed upregulation of established PDA markers such as *SFN* (14-3-3σ) were selected for analysis of *SOX9* and *BTRC*. Box plots indicate median and inter-quartile range (box), 10th and 90th percentiles (whiskers), and minimum and maximum values (asterisk).

**Table S1: Microarray expression analyses of Sox9 and  $\beta$ -TRCP in primary pancreatic cancer.**

| Data Source<br>(Reference)     | Sox9 (Cancer vs Normal) |         |      | $\beta$ -TrCP (Cancer vs Normal) |         |       | Stratifyn (Cancer vs Normal) |         |      |
|--------------------------------|-------------------------|---------|------|----------------------------------|---------|-------|------------------------------|---------|------|
|                                | Probe                   | P value | Fold | Probe                            | P value | Fold  | Probe                        | P value | Fold |
| Badea et al., 2008             | 202936_s_at             | 0.0020  | 1.87 | 204901_at                        | 6.5E-07 | -1.22 | 33323_r_at                   | 1.8E-11 | 6.66 |
|                                |                         |         |      | 222374_at                        | 1.2E-05 | -1.21 |                              |         |      |
| Iacobuzio-Donahue et al., 2003 | IMAGE:753184            | 0.19    | 1.35 | IMAGE:461628                     | 0.061   | -1.25 | IMAGE:2027515                | 1.1E-06 | 20.2 |
| Pei et al., 2009               | 202936_s_at             | 0.014   | 1.79 | 222374_at                        | 0.034   | -1.12 | 33323_r_at                   | 2.3E-08 | 19.0 |
| Segara et al., 2005            | 202936_s_at             | 0.50    | 1.00 | 204901_at                        | 0.026   | -1.23 | 33323_r_at                   | 3.3E-06 | 9.74 |

**Table S2: Oligonucleotide sequences for siRNA and shRNA**

| siRNA/shRNA  | Target sequence (5'-3') | Source                                                                                            |
|--------------|-------------------------|---------------------------------------------------------------------------------------------------|
| Ctrl         | Firefly luciferase      | siGENOME Non-Targeting siRNA #2, Thermo Scientific (Dharmacon), D-001210-02                       |
| Ctrl2        | GATGGGGAGTTTCCAGGTTCA   | Thermo Scientific (Dharmacon), custom                                                             |
| BTRC #1      | GCGACATAGTTTACAGAGA     | siGENOME siRNA, Thermo Scientific (Dharmacon), D-044048-04                                        |
| BTRC #2      | Smart Pool              | siGENOME SMARTpool siRNA, Thermo Scientific (Dharmacon), M-003463-01                              |
| GLI1         | Smart Pool              | ON-TARGETplus SMARTpool siRNA, Thermo Scientific (Dharmacon), L-003896-00                         |
| SOX9         | GAACGCACATCAAGACGGA     | siGENOME siRNA, Thermo Scientific (Dharmacon), D-059108-01                                        |
| TO shCtrl    | Scrambled sequence      | Non-silencing TRIPZ lentiviral inducible shRNAir control (Open Biosystems, RHS4743)               |
| TO shSOX9    | ACCCGCTCACAGTACGACT     | The hairpin sequence from pGIPZ-shRNAir (Open Biosystems, V3LHS_396212) was inserted into pTRIPZ. |
| Rat Sox9 #1  | AGAACAAGCCACACGTCAA     | Thermo Scientific (Dharmacon), custom                                                             |
| Rat Sox9 #2  | CTGCTGAACGAGAGCGAGA     | Thermo Scientific (Dharmacon), custom                                                             |
| Rat shCtrl   | Scrambled sequence      | Hairpin sequence was inserted into the pSilencer 2.1-U6 neo vector (Life Technologies, AM5764).   |
| Rat Sox9 sh1 | GAGAGCGAGGAAGATAAAT     | Hairpin sequence was inserted into the pSilencer 2.1-U6 neo vector (Life Technologies, AM5764).   |
| Rat Sox9 sh2 | GGAAGATAAATCCCAGTGTG    | Hairpin sequence was inserted into the pSilencer 2.1-U6 neo vector (Life Technologies, AM5764).   |

**Table S3: Oligonucleotides for real-time quantitative PCR analysis**

| Gene             | Sense (5'-3')                | Antisense (5'-3')       |
|------------------|------------------------------|-------------------------|
| <i>BTRC</i>      | CTGCAGGGACACTCTGTCTAC        | GAAGTCCCAGATGAGGATTGTG  |
| <i>CTNNB1</i>    | CCCACTGGCCTCTGATAAAGG        | ACGCAAAGGTGCATGATTG     |
| <i>c-Myc</i>     | CGACGAGACCTTCATCAAAA         | TGCTGTTCGTTGAGAGGGTAG   |
| <i>CD24</i>      | AAACAACAACCTGGAACCTCAAGTAACT | GGTGGTGGCATTAGTTGGATTG  |
| <i>CD44</i>      | TGCCGCTTTGCAGGTGTAT          | GGCCTCCGTCCGAGAGA       |
| <i>CD133</i>     | TGGATGCAGAACTTGACAACGT       | ATACCTGCTACGACAGTCGTGGT |
| <i>CXCR4</i>     | GCCTTATCCTGCCTGGTATTGTC      | GCGAAGAAAGCCAGGATGAGGAT |
| <i>ESA</i>       | GCAGCTCAGGAAGAATGTG          | CAGCCAGCTTTGAGCAAATGAC  |
| <i>GAPDH</i>     | TCACCACCATGGAGAAGGC          | GCTAAGCAGTTGGTGGTGCA    |
| <i>GLI1</i>      | ACAGAAGGACTGTCTGGCCCGC       | GGTGAGATGGACAGTGCCCGC   |
| <i>GLI2</i>      | GCCCTTCCTGAAAAGAAGAC         | CATTGGAGAAACAGGATTGG    |
| <i>KLF4</i>      | AGAGTTCCCATCTCAAGGCA         | GTCAGTTCATCTGAGCGGG     |
| <i>OCT4</i>      | GAAGCAGAAGAGGATCACCTTG       | TTCTTAAGGCTGAGCTGCAAG   |
| <i>SNAIL</i>     | TCTGAGTGGGTCTGGAGGTG         | CTCTAGGCCCTGGCTGCTAC    |
| <i>SOX2</i>      | AACCCCAAGATGCACAACCTC        | GCTTAGCCTCGTCGATGAAC    |
| <i>SOX9</i>      | CCCTTCGTGGAGGAGGCGGA         | CCGGAGGAGGAGTGTGGCGA    |
| Rat <i>Bcl2</i>  | CGGAGGCTGGGATGCCTTTGT        | TGTGGCCCAGGTATGCACCCA   |
| Rat <i>Gapdh</i> | TCACCACCATGGAGAAGGC          | GCTAAGCAGTTGGTGGTGCA    |
| Rat <i>Ptch1</i> | CCAGGCTGCTGTGGTGGTGG         | CCGGCTGACACAGGGGCTTG    |
| Rat <i>Sox9</i>  | GCGAGGAAGATAAATTCCCAGTG      | GTGGTCTTTCTTGTGCTGCACGC |
